# Supplementary material for: An electrochemical biosensor for rapid detection of anti-dsDNA antibodies in absolute scale
Source: Royal Society of Chemistry journal article supplement (doi:10.1039/c8an00020d), 2018-01-01
Supplement: c8an00020d1.pdf [file c8an00020d1.pdf]

## An electrochemical biosensor for rapid detection of anti-dsDNA antibodies in absolute scale.

Pablo Fagúndez<sup>1</sup>, Gustavo Brañas<sup>1</sup>, Ernesto Cairoli<sup>2</sup>, Justo Laíz<sup>1</sup>, Juan Pablo Tosar<sup>1,3\*</sup>

<sup>1</sup>Analytical Biochemistry Unit, Nuclear Research Center, Faculty of Science. Universidad de la República. Montevideo 11400. Uruguay. <sup>2</sup>Systemic Autoimmune Diseases Unit, Clínica Médica C, Hospital de Clínicas, Universidad de la República. Montevideo 11600. Uruguay. <sup>3</sup>Functional Genomics Unit. Institut Pasteur de Montevideo. Montevideo 11400. Uruguay. \*Email: jptosar@cin.edu.uy

### Supplementary Figures

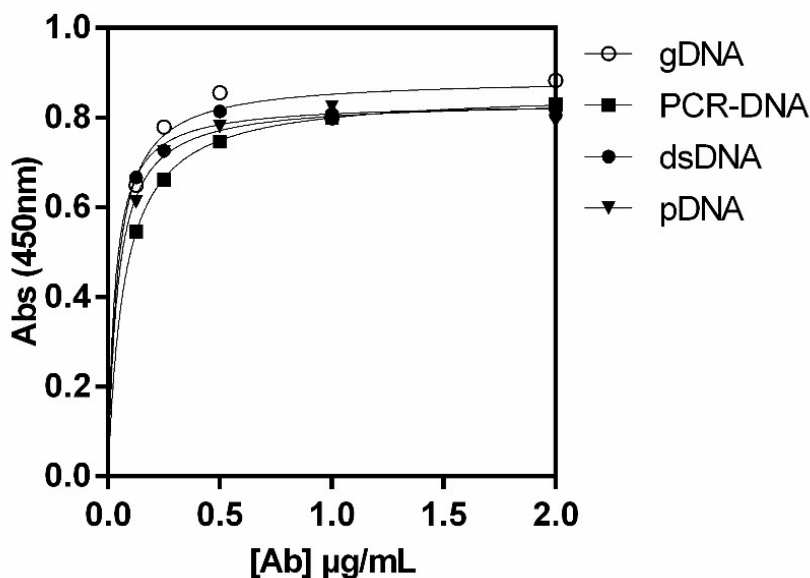

**Supplementary Figure 1.** ELISA assay for  $\alpha$ -dsDNA antibodies in plates sensitized with purified genomic mammalian DNA (gDNA), a purified PCR product (PCR-DNA), commercial salmon sperm DNA (dsDNA) and plasmid DNA (pDNA).

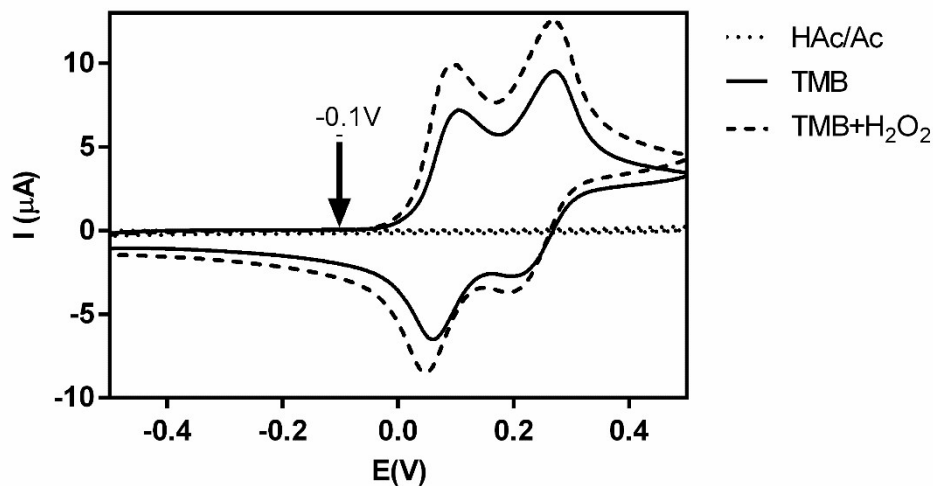

**Supplementary figure 2.** Cyclic voltammetry of TMB solution (full line), acetic/acetate buffer (dots) and TMB plus H<sub>2</sub>O<sub>2</sub> solution (dashed line). The arrow indicates the working potential which was chosen for constant potential measurements.

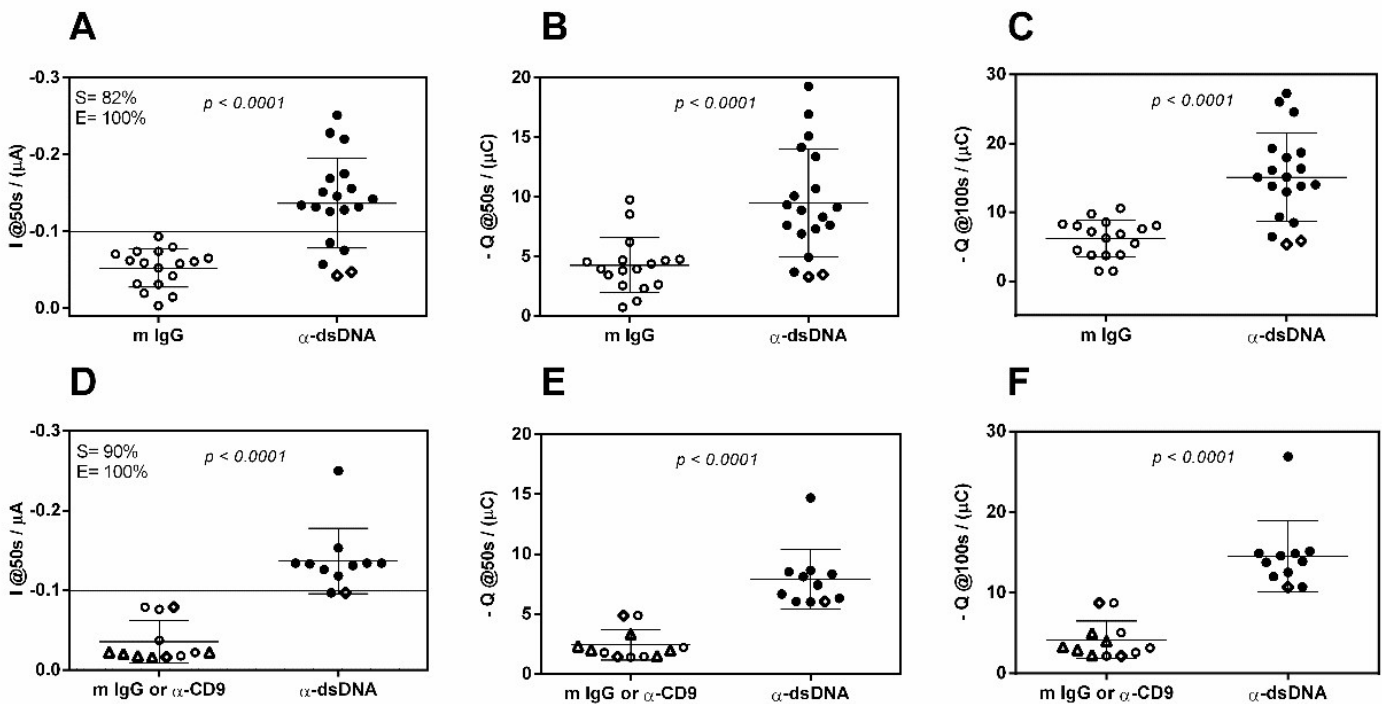

**Supplementary Figure 3.** Comparison of the “two-step” (A-D) or “one-step” (D-F) methods, with different readouts: intensity at 50 seconds (A, D) or electrical charge passed through the electrodes during 50 (B, E) or 100 (C, F) seconds. The same bi-electrodes strips were incubated with  $\alpha$ -dsDNA (black circles) and mouse IgG (white circles) or monoclonal  $\alpha$ -CD9 antibodies (white triangles). Diamonds correspond to electrodes not modified with dsDNA (negative controls). Error bars correspond to the standard error of the mean. Student t test (two-tailed) was used to address statistical significance. In all cases, antibodies were spiked-in in 1/80 fetal bovine serum.-

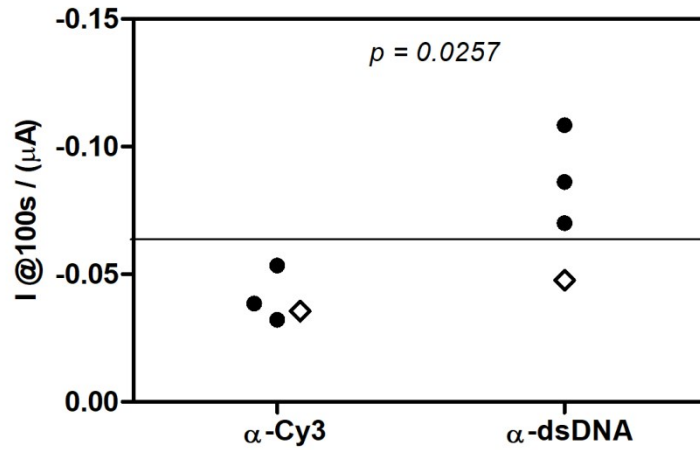

**Supplementary Figure 4.** Sensor response (“one-step” method) in positive or negative mouse serum samples (spiked with  $\alpha$ -dsDNA or  $\alpha$ -Cy3 monoclonal antibodies, respectively). Diamonds correspond to electrodes not modified with dsDNA (negative controls). Student t test (two-tailed) was used to address statistical significance. In all cases, antibodies were spiked-in in 1/80 adult mouse (BALB/c strain) serum.
